# Supplementary material for: Healthcare Practitioners’ Perceptions of the Barriers to Prescribing or Promoting Exercise in the Treatment of People with Mental Illness: A Scoping Review
Source: Hindawi journal article supplement (doi:10.1155/2024/8894586), 2024-01-01
Supplement: f1 [file 8894586.f1.zip]

Archive with 3 entries (3 files):
- Supplementary Table 1 - Included articles.doc
- Supplementary Table 2 - Articles assessed for eligibility.doc
- Supplementary Table 3 - Summary of reasons for exclusion.doc
